# Supplementary material for: Rate-dependent elastic hysteresis during the peeling of pressure sensitive adhesives
Source: Royal Society of Chemistry journal article supplement (doi:10.1039/c5sm00260e), 2015-01-01
Supplement: c5sm00260e1.pdf [file c5sm00260e1.pdf]

The movie supplied as Electronic Supplementary Information contains the microscopic investigation of the fibril formation in the debonding region, during a steady state peeling test of a Scotch 3M 600 adhesive tape. The peeling angle and velocity are respectively  $\vartheta=60^\circ$  and  $V = 30 \mu\text{m/s}$ . The video is accelerated at twice the real time. The field of view is  $1.47 \times 1.1 \text{ mm}$ .
